# Supplementary material
Source: PubMed Central journal article supplement (PMC4950306)
Supplement: BRV-91-760-s001.pdf [file BRV-91-760-s001.pdf]

**Appendix S1.** Indicators of biodiversity and ecosystem services and their respective synonyms used in the literature search. The search text combined the indicators and synonyms indicated here with each of the focal disturbance agents (i.e. fire, wind and bark beetles).

| Criterion                                        | Indicator                                        | Synonyms                                                                                                                                                                                   |
|--------------------------------------------------|--------------------------------------------------|--------------------------------------------------------------------------------------------------------------------------------------------------------------------------------------------|
| <u>Biodiversity</u>                              |                                                  |                                                                                                                                                                                            |
| Biodiversity                                     | Species richness                                 |                                                                                                                                                                                            |
|                                                  | Habitat                                          | Living space; biotope; structural diversity; species abundance                                                                                                                             |
|                                                  | Diversity indices                                | Species diversity; biodiversity; genetic diversity                                                                                                                                         |
| <u>Supporting services</u>                       |                                                  |                                                                                                                                                                                            |
| Primary production                               | Primary production                               | Primary productivity; NPP; GPP                                                                                                                                                             |
| Oxygen production                                | Air quality                                      | Oxygen                                                                                                                                                                                     |
| <u>Provisioning services</u>                     |                                                  |                                                                                                                                                                                            |
| Timber                                           | Timber                                           | Biomass production; biomass productivity; timber production; timber productivity; fuelwood                                                                                                 |
| Fresh water                                      | Fresh water                                      | Drinking water; water supply; water provisioning; water purification                                                                                                                       |
| Food (plants)                                    | Vegetables                                       | Berries; mushrooms; nuts; herbs                                                                                                                                                            |
| Food (game)                                      | Meat                                             | Animal food; carnal food; fleshy food; hunting; game; venison; deer; elk                                                                                                                   |
| <u>Regulating services</u>                       |                                                  |                                                                                                                                                                                            |
| Protection against gravitational natural hazards | Protection against gravitational natural hazards | Rockfall protection; rockslide; avalanche protection; flooding protection; floodwater; flood; mudflow protection; mudslide; landslide; protection against soil erosion; soil loss; erosion |
| Climate regulation                               | Carbon storage                                   | Carbon sequestration; net ecosystem productivity; net ecosystem exchange; net ecosystem carbon balance; NEP; NEE; NECB                                                                     |
|                                                  | Albedo                                           |                                                                                                                                                                                            |
|                                                  | Latent heat flux                                 |                                                                                                                                                                                            |
| <u>Cultural services</u>                         |                                                  |                                                                                                                                                                                            |
| Recreation                                       | Recreation                                       | Tourism; mountainbiking; hiking; camping; scenic beauty; scenic value                                                                                                                      |
| Inspiration                                      | Inspiration                                      | Art; folklore; writing; essay; painting; drawing; sculpture                                                                                                                                |
| Intellectual development                         | Intellectual development                         | Science; education; cognitive development                                                                                                                                                  |
