# Supplementary material
Source: PubMed Central journal article supplement (PMC4950306)
Supplement: BRV-91-760-s003.pdf [file BRV-91-760-s003.pdf]

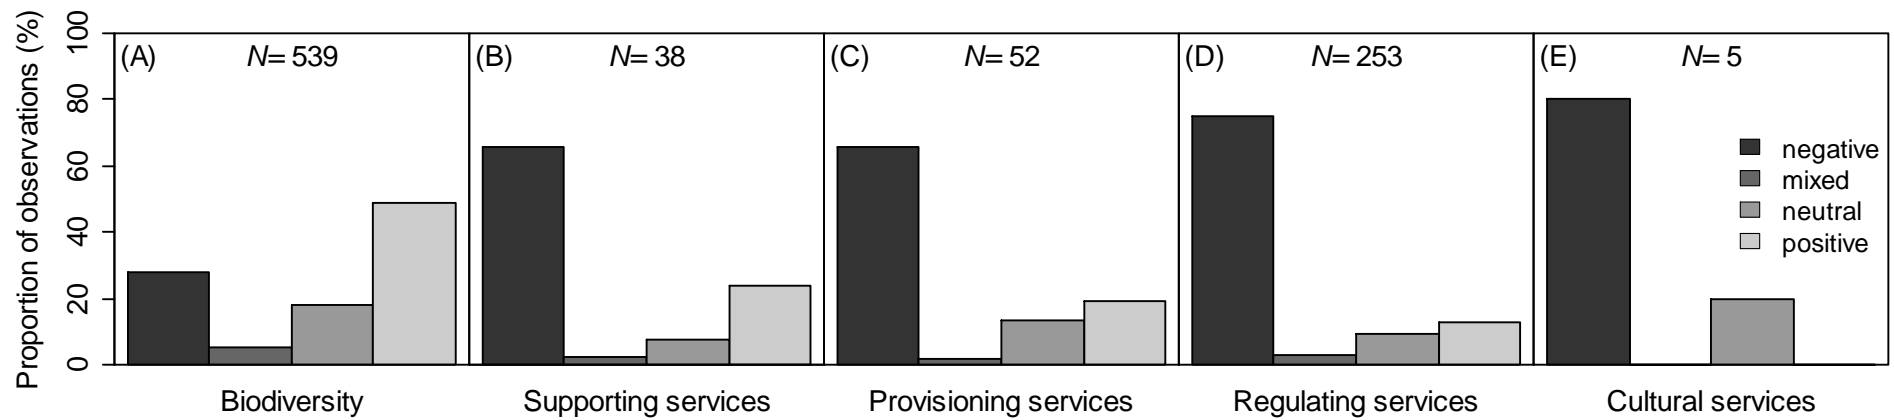

**Fig. S1.** Disturbance effects on biodiversity and ecosystem service categories (following the definition of the Millennium Ecosystem Assessment, 2005): (A) biodiversity, (B) supporting services, (C) provisioning services, (D) regulation services and (E) cultural services. *N* indicates the number of observations.
